# Supplementary material
Source: HighWire-hosted journal article supplement (https://www.highwirestage.com/highwire/filestream/77259/field_highwire_adjunct_files/0/19-01364.pdf)
Supplement: 19-01364.pdf [file 19-01364.pdf]

On-line Table: Enhancement characteristics of all newly formed lesions<sup>a</sup>

| Lesion No. | Participant No. | T2-FLAIR Appearance           | Manganese Appearance          | Gadolinium Enhancement? | Manganese Enhancement Type                   |
|------------|-----------------|-------------------------------|-------------------------------|-------------------------|----------------------------------------------|
| 1          | 1               | 2 Days pre-Mn <sup>2+</sup>   | 0 day post-Mn <sup>2+</sup>   | Yes                     | Central lesion enhancement, peripheral blush |
| 2          | 3               | 7 Days pre-Mn <sup>2+</sup>   | N/A                           | Yes                     | N/A                                          |
| 3          | 3               | 7 Days pre-Mn <sup>2+</sup>   | N/A                           | Yes                     | N/A                                          |
| 4          | 3               | 27 Days post-Mn <sup>2+</sup> | N/A                           | Yes                     | N/A                                          |
| 5          | 5               | 31 Days post-Mn <sup>2+</sup> | 31 Days post-Mn <sup>2+</sup> | No                      | Punctate                                     |
| 6          | 5               | 31 Days post-Mn <sup>2+</sup> | 31 Days post-Mn <sup>2+</sup> | No                      | Blush                                        |
| 7          | 5               | 31 Days post-Mn <sup>2+</sup> | 31 Days post-Mn <sup>2+</sup> | No                      | Punctate                                     |
| 8          | 5               | 31 Days post-Mn <sup>2+</sup> | 31 Days post-Mn <sup>2+</sup> | Yes                     | Punctate                                     |
| 9          | 5               | 31 Days post-Mn <sup>2+</sup> | 31 Days post-Mn <sup>2+</sup> | Yes                     | Blush                                        |
| 10         | 5               | 31 Days post-Mn <sup>2+</sup> | 31 Days post-Mn <sup>2+</sup> | Yes                     | Blush                                        |
| 11         | 5               | 31 Days post-Mn <sup>2+</sup> | 31 Days post-Mn <sup>2+</sup> | Yes                     | Punctate                                     |
| 12         | 5               | 31 Days post-Mn <sup>2+</sup> | 31 Days post-Mn <sup>2+</sup> | Yes                     | Punctate                                     |
| 13         | 5               | 38 Days post-Mn <sup>2+</sup> | 31 Days post-Mn <sup>2+</sup> | Yes                     | Punctate                                     |
| 14         | 5               | 38 Days post-Mn <sup>2+</sup> | N/A                           | No                      | N/A                                          |

**Note:**— N/A indicates not applicable.  
<sup>a</sup>Fourteen new T2-FLAIR lesions developed during the study. Eight were first seen 31 days after mangafodipir injection, and 2 were first seen at day 38 postmangafodipir. Three lesions visible on T2-FLAIR were gadolinium-enhancing before manganese injection, of which 1 enhanced with manganese. One lesion was noted 27 days postmangafodipir and did not enhance with manganese.

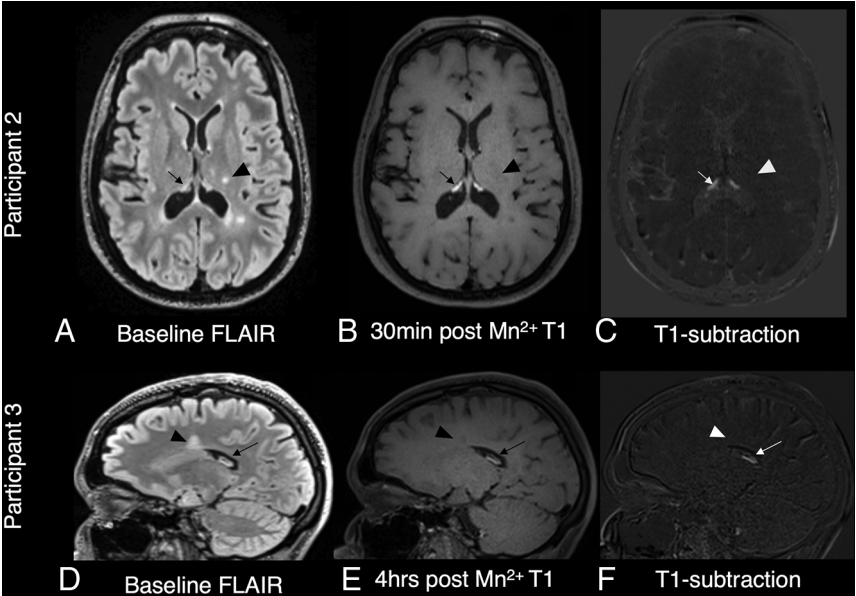

**ON-LINE FIG 1.** Pre- and postmangafodipir images show enhancement of the choroid plexus but not chronic (non-gadolinium-enhancing) MS lesions in 2 participants. T2-FLAIR (A and D) and T1-weighted (B and E) images from participants 2 (A–C) and 3 (D–F). Subtraction images (C and F) were generated by subtracting the baseline T1-weighted scan from the postmangafodipir T1-weighted scan (30 minutes after injection for participant 2 and 4 hours after injection for participant 3). Typical manganese enhancement of the choroid plexus (arrows) occurs soon after injection, but no enhancement in nonacute MS lesions was noted (triangles).

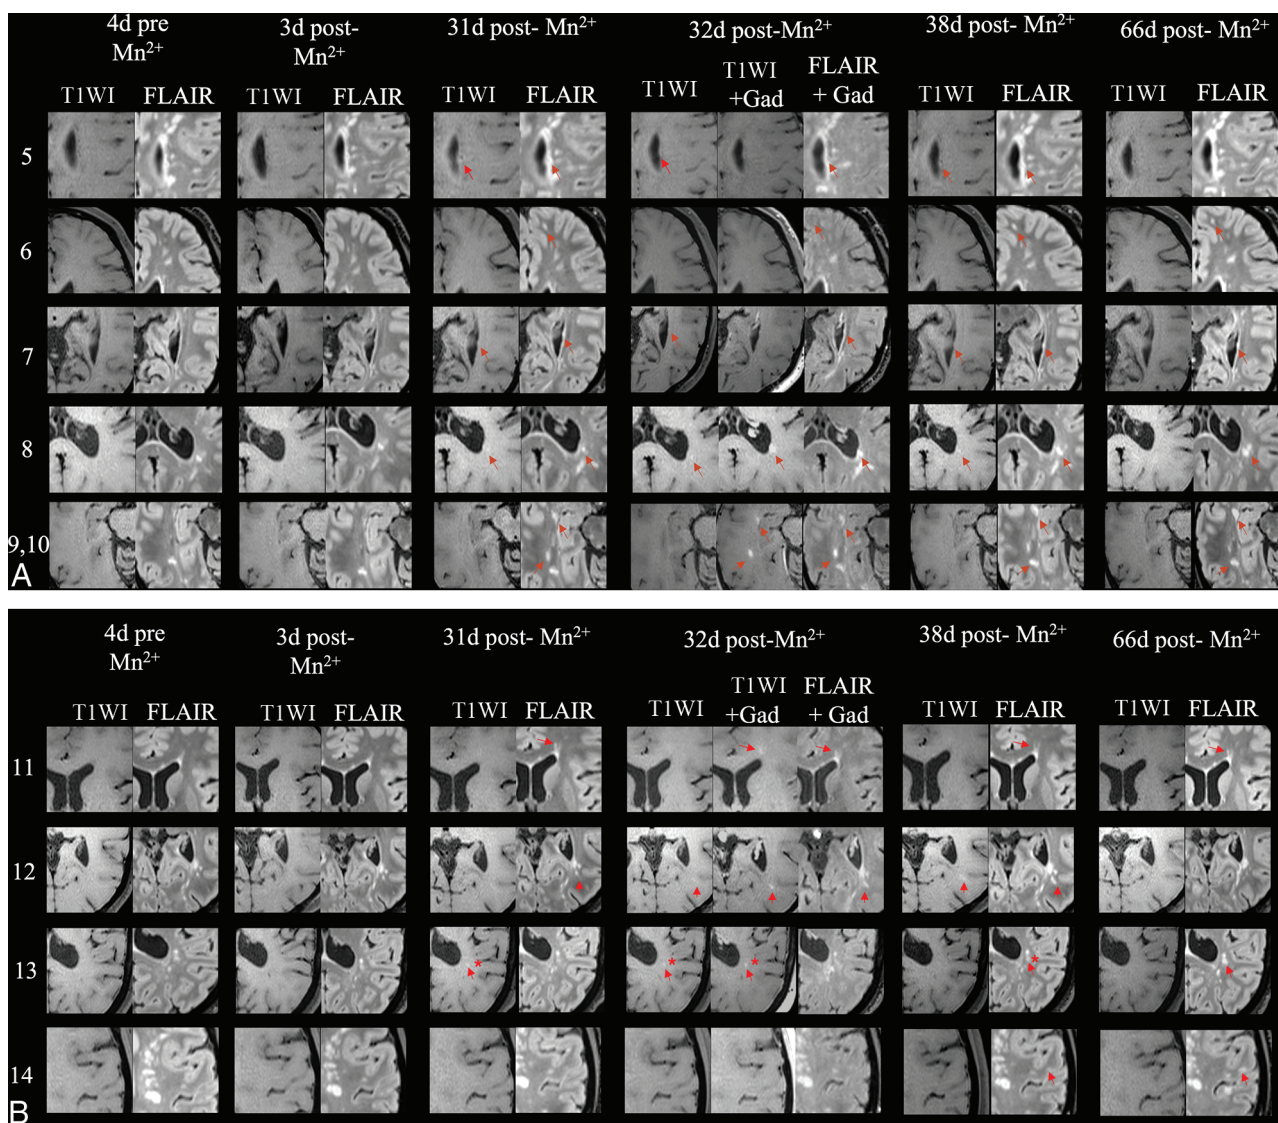

**ON-LINE FIG 2.** (in 2 parts). All lesions that developed during the course of this study in participant 5, a 33-year-old woman with relapsing-remitting MS. Lesion 13, demarcated by a star, enhanced on T1-weighted images with manganese before clear visibility on FLAIR.
